# Supplementary material for: Gender inequity and age-appropriate immunization coverage in India from 1992 to 2006
Source: PubMed Central journal article supplement (PMC3226235; doi:10.1186/1472-698x-9-s1-s3), 2009-10-14
Supplement: 1472-698X-9-S1-S3-S2.pdf [file 1472-698X-9-S1-S3-S2.pdf]

## **Web Appendix: Distributions of time to immunization, by antigen, gender and year of birth.**

Supplement to: Corsi DJ, Bassani DG, Kumar R, et al. Gender inequity and age-appropriate immunization coverage in India from 1992 to 2006.

This web appendix presents the distributions (box and whisker plots) of the time to vaccination for each antigen by year of birth. Boys and girls are presented separately. Dashed red lines indicate time of age-appropriate vaccine administration. Red diamonds indicate the mean time to vaccination. The full data table is also presented. Children born in 1994, 1995, 2000 and 2006 (for measles only), are not covered by the NFHS surveys and no data are presented for these years.

### BCG (GIRLS)

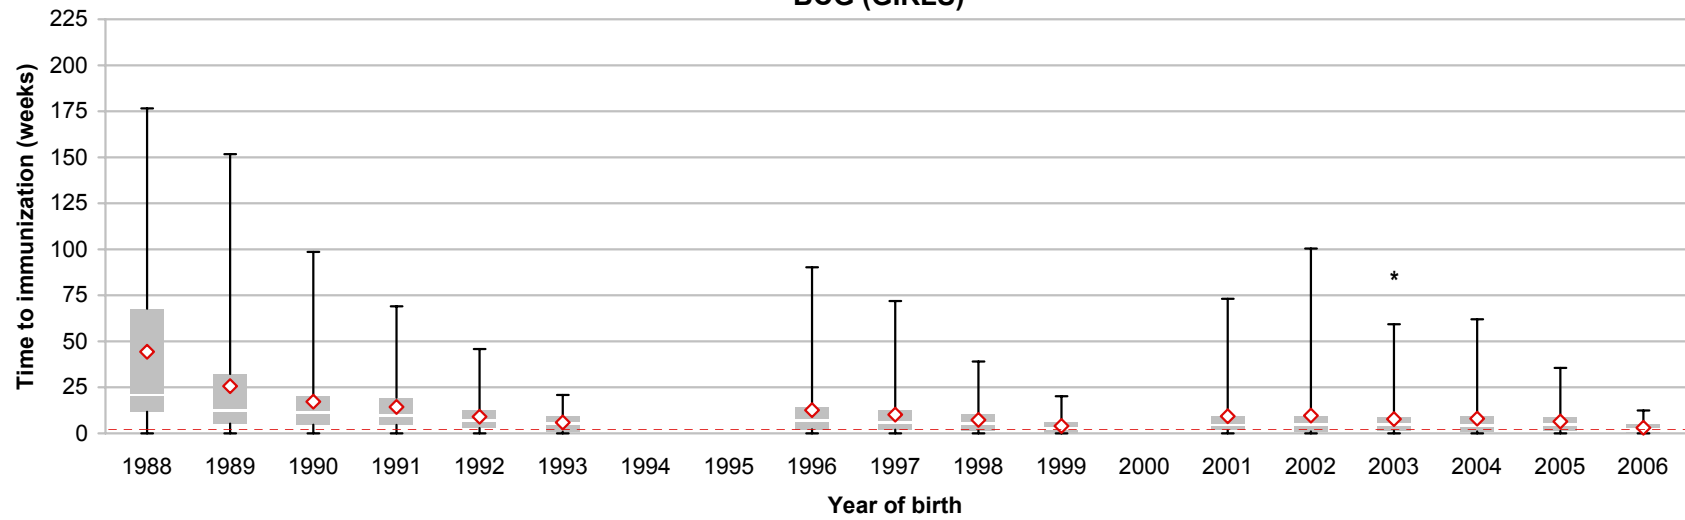

|         | 1988   | 1989   | 1990   | 1991   | 1992  | 1993  | 1994 | 1995 | 1996   | 1997   | 1998  | 1999  | 2000 | 2001   | 2002   | 2003   | 2004   | 2005  | 2006  |
|---------|--------|--------|--------|--------|-------|-------|------|------|--------|--------|-------|-------|------|--------|--------|--------|--------|-------|-------|
| 1st     | 0.00   | 0.00   | 0.00   | 0.00   | 0.00  | 0.00  |      |      | 0.00   | 0.00   | 0.00  | 0.00  |      | 0.00   | 0.00   | 0.00   | 0.00   | 0.00  | 0.00  |
| 25th    | 11.71  | 5.29   | 4.71   | 4.57   | 2.86  | 0.86  |      |      | 2.14   | 2.00   | 1.57  | 0.43  |      | 1.71   | 1.00   | 1.43   | 1.00   | 1.29  | 0.43  |
| 50th    | 20.86  | 12.71  | 11.29  | 9.86   | 6.86  | 5.14  |      |      | 7.00   | 5.86   | 5.57  | 2.57  |      | 4.71   | 4.86   | 4.71   | 4.29   | 4.57  | 1.86  |
| 75th    | 67.71  | 32.29  | 20.29  | 19.43  | 12.57 | 9.14  |      |      | 14.00  | 12.29  | 10.29 | 6.00  |      | 9.43   | 9.00   | 8.71   | 9.00   | 8.57  | 4.71  |
| 99th    | 176.57 | 151.71 | 98.57  | 69.00  | 45.86 | 20.86 |      |      | 90.29  | 71.86  | 39.00 | 20.14 |      | 73.14  | 100.43 | 59.29  | 62.00  | 35.57 | 12.43 |
| Mean    | 44.35  | 25.61  | 17.26  | 14.35  | 9.02  | 5.88  |      |      | 12.59  | 10.19  | 7.35  | 3.98  |      | 9.32   | 9.66   | 7.77   | 8.01   | 6.46  | 3.02  |
| SD      | 47.58  | 32.36  | 20.56  | 14.69  | 8.83  | 5.28  |      |      | 18.44  | 14.21  | 7.86  | 4.88  |      | 15.00  | 18.54  | `      | 11.92  | 7.26  | 3.14  |
| Minimum | 0.00   | 0.00   | 0.00   | 0.00   | 0.00  | 0.00  |      |      | 0.00   | 0.00   | 0.00  | 0.00  |      | 0.00   | 0.00   | 0.00   | 0.00   | 0.00  | 0.00  |
| Maximum | 176.57 | 162.00 | 131.86 | 109.86 | 63.71 | 20.86 |      |      | 135.00 | 115.00 | 83.86 | 60.43 |      | 228.86 | 166.43 | 161.43 | 104.29 | 67.14 | 18.71 |
| N       | 42     | 435    | 814    | 1249   | 1154  | 131   |      |      | 546    | 1081   | 1341  | 318   |      | 490    | 844    | 1008   | 1349   | 1780  | 365   |

\* p < 0.05 test for difference in mean time to vaccination between girls and boys

### BCG (BOYS)

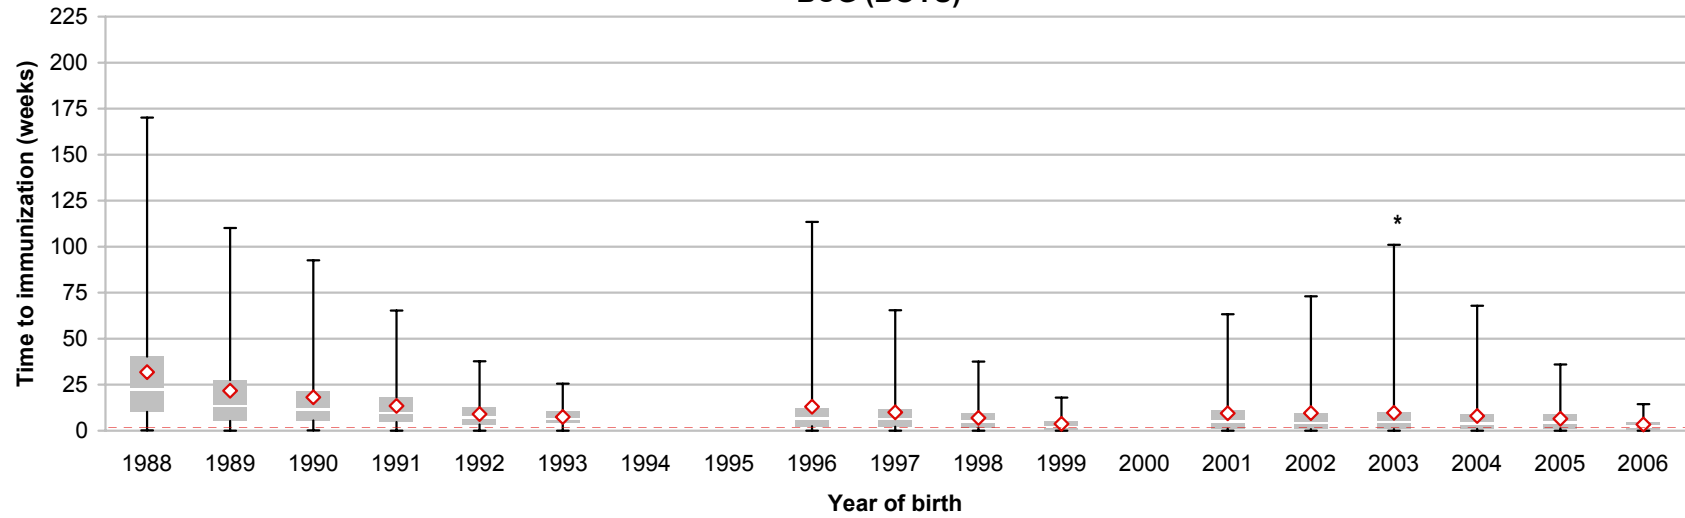

|         | <u>1988</u> | <u>1989</u> | <u>1990</u> | <u>1991</u> | <u>1992</u> | <u>1993</u> | <u>1994</u> | <u>1995</u> | <u>1996</u> | <u>1997</u> | <u>1998</u> | <u>1999</u> | <u>2000</u> | <u>2001</u> | <u>2002</u> | <u>2003</u> | <u>2004</u> | <u>2005</u> | <u>2006</u> |
|---------|-------------|-------------|-------------|-------------|-------------|-------------|-------------|-------------|-------------|-------------|-------------|-------------|-------------|-------------|-------------|-------------|-------------|-------------|-------------|
| 1st     | 0.14        | 0.00        | 0.14        | 0.00        | 0.00        | 0.00        |             |             | 0.00        | 0.00        | 0.00        | 0.00        |             | 0.00        | 0.00        | 0.00        | 0.00        | 0.00        | 0.00        |
| 25th    | 10.29       | 5.29        | 5.57        | 4.71        | 3.43        | 4.29        |             |             | 2.43        | 2.14        | 1.71        | 0.43        |             | 1.14        | 0.86        | 0.86        | 1.00        | 1.29        | 0.57        |
| 50th    | 22.29       | 13.57       | 11.57       | 9.43        | 7.14        | 6.57        |             |             | 6.71        | 6.29        | 5.14        | 2.00        |             | 4.86        | 4.29        | 4.57        | 4.00        | 4.57        | 2.29        |
| 75th    | 40.29       | 27.57       | 21.57       | 18.14       | 12.57       | 10.71       |             |             | 12.43       | 11.57       | 9.43        | 5.43        |             | 10.86       | 9.57        | 10.00       | 8.71        | 8.71        | 4.71        |
| 99th    | 170.14      | 110.14      | 92.57       | 65.29       | 37.71       | 25.57       |             |             | 113.43      | 65.43       | 37.57       | 18.00       |             | 63.29       | 73.00       | 101.00      | 67.86       | 36.00       | 14.43       |
| Mean    | 31.81       | 21.74       | 18.20       | 13.47       | 9.06        | 7.50        |             |             | 13.08       | 9.97        | 6.92        | 3.78        |             | 9.47        | 9.53        | 9.76        | 7.99        | 6.53        | 3.35        |
| SD      | 36.93       | 24.24       | 20.53       | 13.43       | 7.88        | 5.46        |             |             | 20.26       | 13.14       | 7.34        | 5.06        |             | 14.29       | 17.42       | 17.22       | 12.83       | 7.32        | 3.51        |
| Minimum | 0.14        | 0.00        | 0.00        | 0.00        | 0.00        | 0.00        |             |             | 0.00        | 0.00        | 0.00        | 0.00        |             | 0.00        | 0.00        | 0.00        | 0.00        | 0.00        | 0.00        |
| Maximum | 170.14      | 127.71      | 129.57      | 108.43      | 58.00       | 25.57       |             |             | 140.57      | 104.00      | 50.00       | 64.14       |             | 234.14      | 189.71      | 153.43      | 106.00      | 66.71       | 22.43       |
| N       | 51          | 500         | 900         | 1419        | 1291        | 150         |             |             | 680         | 1272        | 1626        | 330         |             | 511         | 885         | 1231        | 1560        | 1977        | 391         |

\* p <0.05 test for difference in mean time to vaccination between girls and boys

### POLIO 1 (GIRLS)

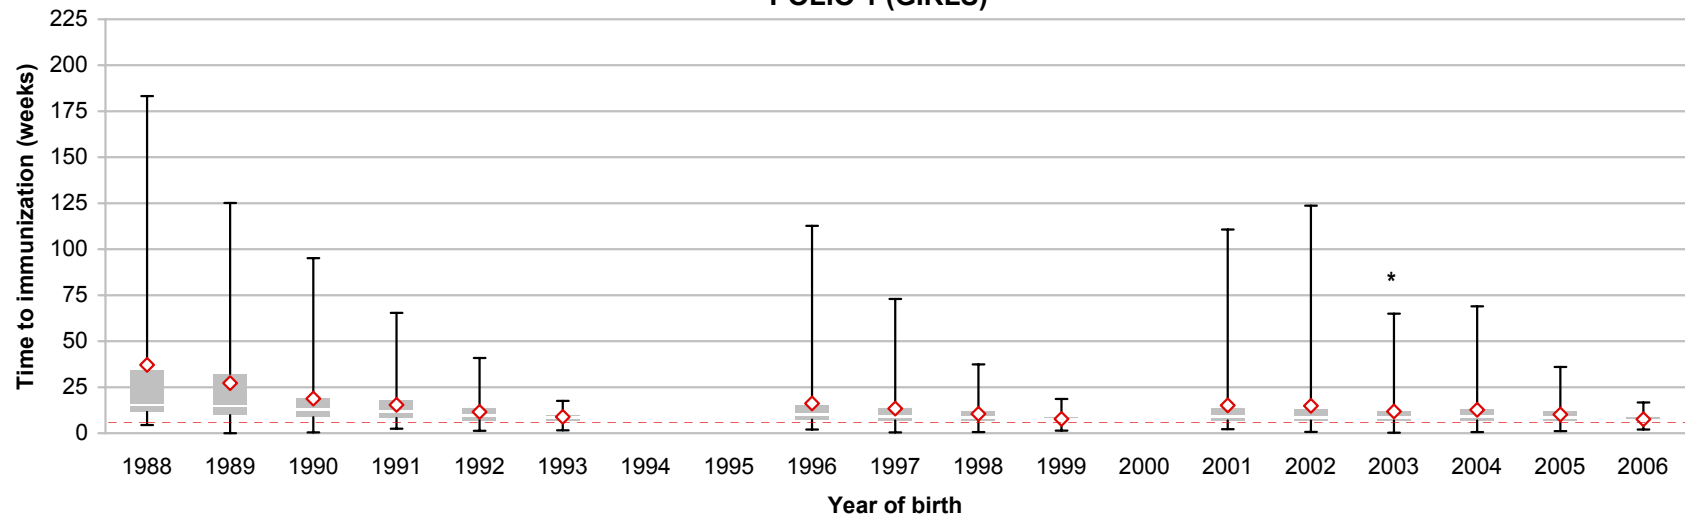

|         | 1988   | 1989   | 1990   | 1991  | 1992  | 1993  | 1994 | 1995 | 1996   | 1997   | 1998  | 1999  | 2000 | 2001   | 2002   | 2003   | 2004  | 2005  | 2006  |
|---------|--------|--------|--------|-------|-------|-------|------|------|--------|--------|-------|-------|------|--------|--------|--------|-------|-------|-------|
| 1st     | 4.43   | 0.00   | 0.43   | 2.43  | 1.29  | 1.57  |      |      | 2.00   | 0.43   | 0.57  | 1.43  |      | 2.14   | 0.71   | 0.29   | 0.57  | 1.14  | 2.00  |
| 25th    | 11.57  | 9.86   | 8.71   | 8.29  | 7.14  | 6.71  |      |      | 7.43   | 7.00   | 6.86  | 6.29  |      | 7.00   | 6.86   | 7.00   | 7.00  | 6.86  | 6.29  |
| 50th    | 15.29  | 14.71  | 12.71  | 11.71 | 9.71  | 8.57  |      |      | 10.14  | 9.00   | 8.57  | 7.14  |      | 9.00   | 8.86   | 8.86   | 9.00  | 8.43  | 7.00  |
| 75th    | 34.29  | 32.29  | 19.00  | 17.71 | 13.71 | 10.00 |      |      | 15.00  | 13.43  | 11.86 | 8.43  |      | 13.29  | 13.14  | 12.14  | 13.14 | 11.71 | 8.71  |
| 99th    | 183.29 | 125.14 | 95.14  | 65.43 | 40.86 | 17.57 |      |      | 112.71 | 73.00  | 37.43 | 18.57 |      | 110.71 | 123.71 | 65.00  | 69.00 | 36.00 | 16.71 |
| Mean    | 37.15  | 27.19  | 18.75  | 15.36 | 11.60 | 8.90  |      |      | 16.14  | 13.38  | 10.49 | 7.76  |      | 15.15  | 14.84  | 11.86  | 12.70 | 10.18 | 7.56  |
| SD      | 45.08  | 28.75  | 18.76  | 11.90 | 7.22  | 3.39  |      |      | 18.78  | 13.86  | 6.63  | 3.93  |      | 23.44  | 19.65  | 12.22  | 12.17 | 6.09  | 2.73  |
| Minimum | 4.43   | 0.00   | 0.00   | 0.00  | 0.14  | 0.43  |      |      | 0.00   | 0.00   | 0.00  | 0.00  |      | 0.14   | 0.00   | 0.00   | 0.00  | 0.00  | 0.29  |
| Maximum | 183.29 | 160.29 | 122.14 | 95.29 | 63.71 | 17.57 |      |      | 126.14 | 115.00 | 83.86 | 60.43 |      | 249.00 | 188.57 | 147.57 | 96.86 | 57.71 | 19.14 |
| N       | 49     | 493    | 915    | 1380  | 1217  | 114   |      |      | 569    | 1132   | 1418  | 280   |      | 510    | 880    | 1059   | 1410  | 1764  | 286   |

\* p < 0.05 test for difference in mean time to vaccination between girls and boys

## POLIO 1 (BOYS)

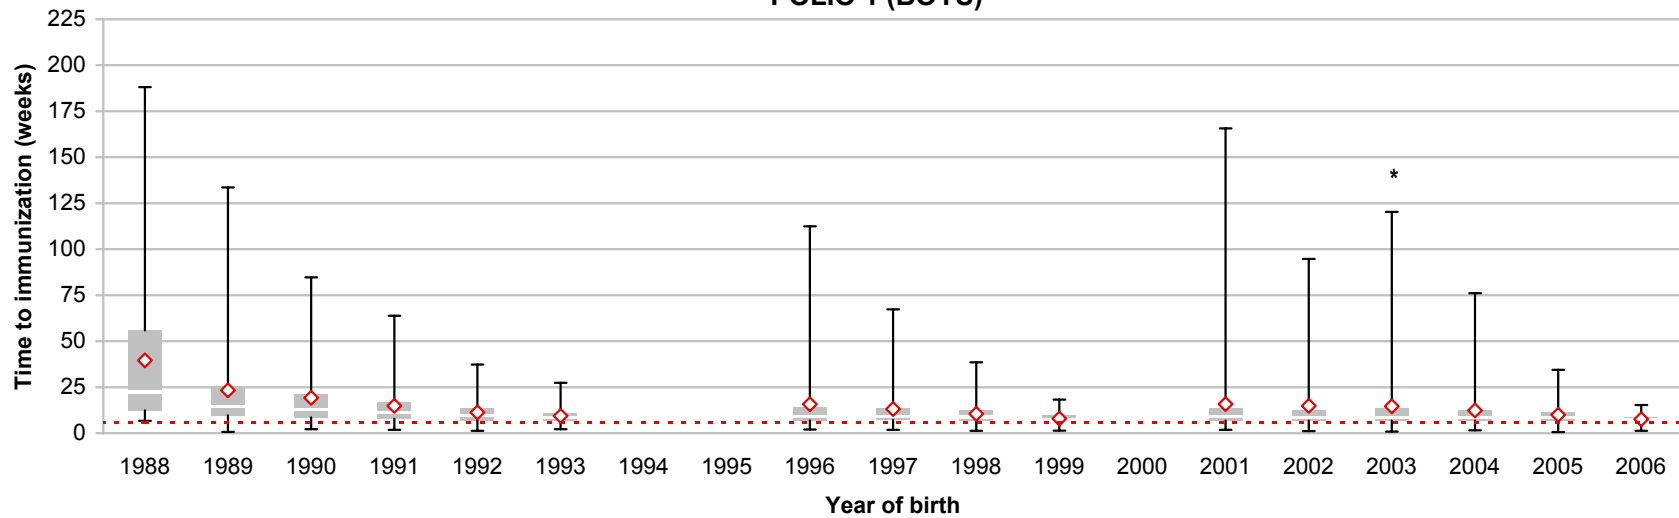

|         | 1988   | 1989   | 1990   | 1991  | 1992  | 1993  | 1994 | 1995 | 1996   | 1997  | 1998  | 1999  | 2000 | 2001   | 2002   | 2003   | 2004   | 2005  | 2006  |
|---------|--------|--------|--------|-------|-------|-------|------|------|--------|-------|-------|-------|------|--------|--------|--------|--------|-------|-------|
| 1st     | 6.71   | 0.71   | 2.14   | 1.86  | 1.29  | 2.14  |      |      | 2.00   | 1.86  | 1.29  | 1.43  |      | 1.86   | 1.14   | 0.86   | 1.57   | 0.57  | 1.29  |
| 25th    | 12.43  | 9.71   | 8.57   | 7.86  | 7.14  | 6.86  |      |      | 7.00   | 7.14  | 6.86  | 6.43  |      | 6.86   | 6.86   | 6.86   | 6.86   | 6.86  | 6.29  |
| 50th    | 22.29  | 14.71  | 12.86  | 11.29 | 9.71  | 8.43  |      |      | 9.14   | 9.14  | 8.86  | 7.29  |      | 9.14   | 8.43   | 8.71   | 8.71   | 8.43  | 7.14  |
| 75th    | 55.86  | 25.57  | 21.00  | 17.14 | 13.43 | 10.57 |      |      | 14.43  | 13.43 | 12.29 | 9.57  |      | 13.57  | 12.29  | 13.57  | 12.71  | 11.29 | 8.57  |
| 99th    | 188.14 | 133.57 | 84.71  | 63.86 | 37.29 | 27.43 |      |      | 112.43 | 67.29 | 38.57 | 18.29 |      | 165.71 | 94.71  | 120.29 | 76.14  | 34.43 | 15.29 |
| Mean    | 39.59  | 23.29  | 19.22  | 14.87 | 11.28 | 9.37  |      |      | 15.76  | 13.09 | 10.54 | 7.94  |      | 15.83  | 14.87  | 14.57  | 12.38  | 10.00 | 7.59  |
| SD      | 44.14  | 24.67  | 18.44  | 11.69 | 6.52  | 4.23  |      |      | 19.36  | 12.41 | 6.51  | 3.25  |      | 23.74  | 20.94  | 18.62  | 12.32  | 5.90  | 2.77  |
| Minimum | 4.14   | 0.43   | 0.14   | 0.00  | 0.14  | 1.71  |      |      | 0.00   | 0.00  | 0.00  | 0.00  |      | 0.57   | 0.00   | 0.00   | 0.00   | 0.00  | 0.14  |
| Maximum | 188.14 | 188.43 | 130.29 | 98.00 | 51.29 | 27.43 |      |      | 141.86 | 99.14 | 64.57 | 38.00 |      | 234.29 | 221.86 | 153.43 | 106.00 | 66.71 | 18.29 |
| N       | 67     | 579    | 1018   | 1588  | 1401  | 153   |      |      | 704    | 1325  | 1677  | 262   |      | 527    | 928    | 1280   | 1615   | 2013  | 301   |

\* p <0.05 test for difference in mean time to vaccination between girls and boys

### POLIO 2 (GIRLS)

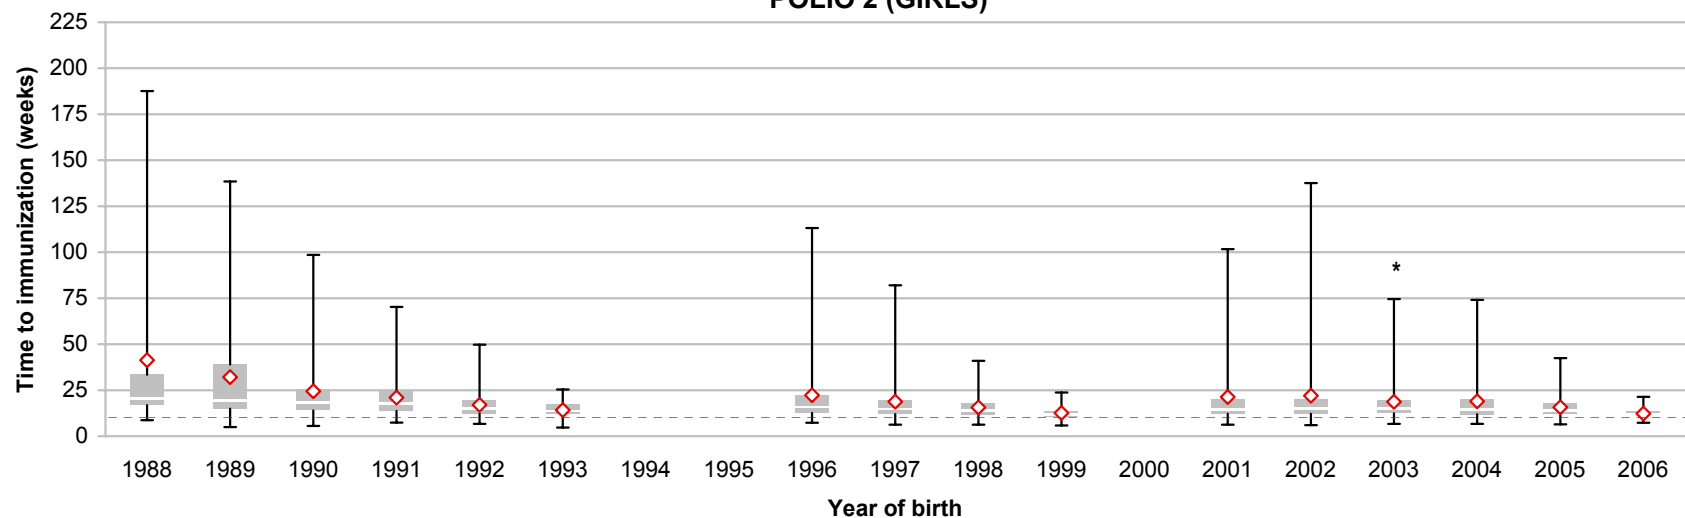

|         | <u>1988</u> | <u>1989</u> | <u>1990</u> | <u>1991</u> | <u>1992</u> | <u>1993</u> | <u>1994</u> | <u>1995</u> | <u>1996</u> | <u>1997</u> | <u>1998</u> | <u>1999</u> | <u>2000</u> | <u>2001</u> | <u>2002</u> | <u>2003</u> | <u>2004</u> | <u>2005</u> | <u>2006</u> |
|---------|-------------|-------------|-------------|-------------|-------------|-------------|-------------|-------------|-------------|-------------|-------------|-------------|-------------|-------------|-------------|-------------|-------------|-------------|-------------|
| 1st     | 8.71        | 5.00        | 5.57        | 7.43        | 6.71        | 4.71        |             |             | 7.29        | 6.29        | 6.29        | 5.86        |             | 6.29        | 6.00        | 6.71        | 6.71        | 6.43        | 7.29        |
| 25th    | 16.86       | 15.00       | 14.00       | 13.71       | 12.29       | 12.00       |             |             | 12.57       | 12.00       | 11.86       | 10.57       |             | 12.14       | 12.14       | 12.43       | 12.00       | 12.00       | 11.00       |
| 50th    | 20.43       | 19.29       | 18.14       | 17.57       | 15.14       | 13.57       |             |             | 15.86       | 14.71       | 14.00       | 11.86       |             | 14.29       | 15.00       | 14.86       | 14.57       | 14.00       | 11.43       |
| 75th    | 33.43       | 39.00       | 25.57       | 24.14       | 19.57       | 17.29       |             |             | 22.43       | 19.86       | 17.71       | 13.71       |             | 20.00       | 20.14       | 19.29       | 20.29       | 18.00       | 13.29       |
| 99th    | 187.57      | 138.43      | 98.57       | 70.29       | 49.71       | 25.43       |             |             | 113.14      | 82.00       | 41.00       | 23.71       |             | 101.71      | 137.57      | 74.57       | 74.14       | 42.43       | 21.43       |
| Mean    | 41.28       | 32.09       | 24.40       | 20.96       | 17.07       | 14.19       |             |             | 22.29       | 18.82       | 15.65       | 12.61       |             | 21.27       | 22.00       | 18.68       | 18.98       | 15.75       | 12.24       |
| SD      | 44.35       | 28.96       | 18.54       | 12.03       | 7.64        | 4.00        |             |             | 19.23       | 12.94       | 6.43        | 5.50        |             | 21.29       | 21.68       | 13.27       | 13.00       | 6.23        | 2.76        |
| Minimum | 8.71        | 3.71        | 3.00        | 2.86        | 4.14        | 4.71        |             |             | 4.00        | 3.14        | 0.00        | 5.00        |             | 5.29        | 2.43        | 4.29        | 3.86        | 3.86        | 6.43        |
| Maximum | 187.57      | 173.57      | 113.14      | 99.43       | 61.71       | 25.43       |             |             | 134.86      | 96.71       | 79.43       | 69.14       |             | 191.00      | 173.43      | 152.14      | 101.71      | 60.14       | 24.86       |
| N       | 49          | 478         | 889         | 1335        | 1008        | 65          |             |             | 549         | 1105        | 1235        | 168         |             | 498         | 869         | 1034        | 1370        | 1592        | 155         |

\* p < 0.05 test for difference in mean time to vaccination between girls and boys

### POLIO 2 (BOYS)

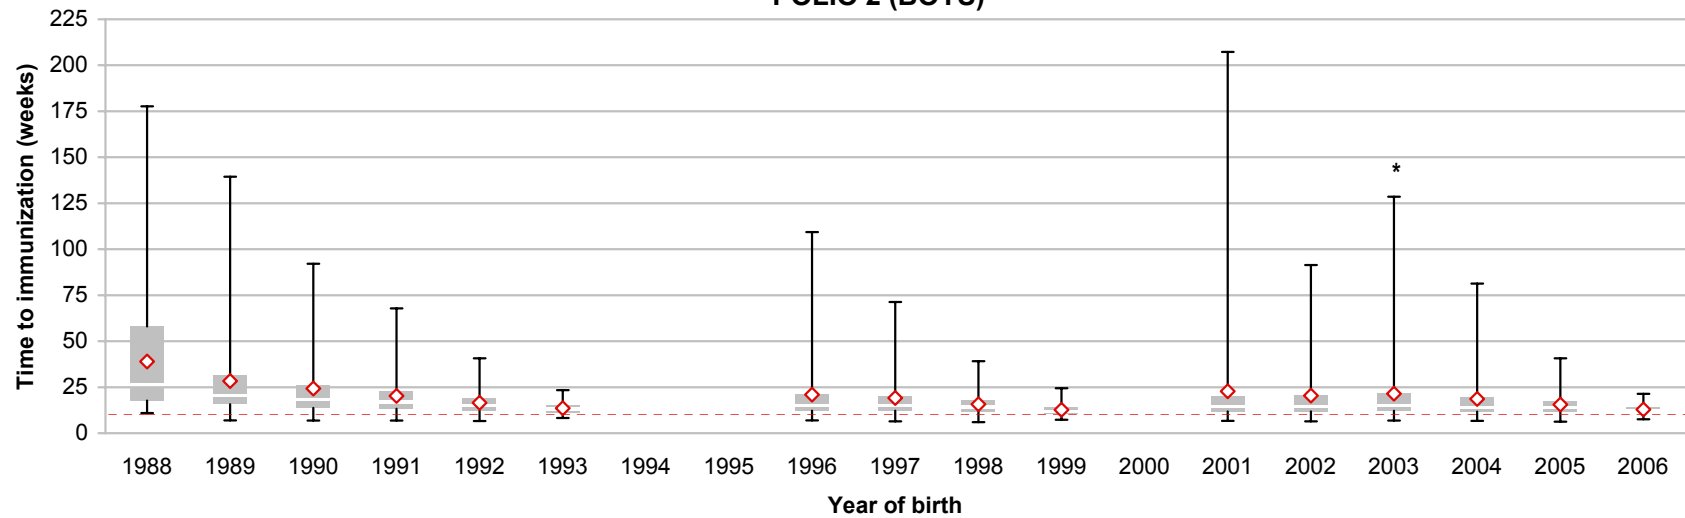

|         | 1988   | 1989   | 1990   | 1991    | 1992    | 1993  | 1994 | 1995 | 1996   | 1997    | 1998    | 1999   | 2000 | 2001   | 2002   | 2003    | 2004    | 2005    | 2006   |        |
|---------|--------|--------|--------|---------|---------|-------|------|------|--------|---------|---------|--------|------|--------|--------|---------|---------|---------|--------|--------|
| 1st     | 11.00  | 7.00   | 6.86   | 6.86    | 6.57    | 8.29  |      |      | 7.00   | 6.43    | 6.00    | 7.29   |      | 6.71   | 6.43   | 6.86    | 6.71    | 6.29    | 7.57   |        |
| 25th    | 17.71  | 15.71  | 13.71  | 13.29   | 12.14   | 11.14 |      |      | 12.29  | 12.29   | 11.86   | 10.71  |      | 11.86  | 11.86  | 12.14   | 11.71   | 11.71   | 11.14  | 11.14  |
| 50th    | 26.29  | 20.29  | 18.29  | 17.00   | 15.00   | 13.14 |      |      | 15.14  | 15.00   | 14.29   | 11.86  |      | 14.71  | 14.57  | 15.00   | 14.14   | 13.86   | 12.14  | 12.14  |
| 75th    | 58.00  | 31.29  | 26.14  | 22.57   | 19.14   | 15.14 |      |      | 21.14  | 20.29   | 17.86   | 14.00  |      | 20.14  | 20.57  | 21.57   | 19.86   | 17.29   | 14.00  | 14.00  |
| 99th    | 177.71 | 139.43 | 92.14  | 67.86   | 40.71   | 23.43 |      |      | 109.29 | 71.29   | 39.14   | 24.43  |      | 207.29 | 91.43  | 128.57  | 81.29   | 40.71   | 21.43  | 21.43  |
| Mean    | 38.93  | 28.39  | 24.24  | 20.25   | 16.49   | 13.53 |      |      | 20.94  | 19.13   | 15.78   | 12.73  |      | 22.81  | 20.47  | 21.48   | 18.64   | 15.60   | 12.86  | 12.86  |
| SD      | 32.64  | 23.63  | 18.01  | 11.32   | 6.58    | 3.37  |      |      | 18.30  | 12.65   | 6.42    | 4.05   |      | 29.93  | 16.98  | 20.21   | 13.16   | 6.26    | 2.75   | 2.75   |
| Minimum | 11.00  | 3.43   | 2.14   | 1.00    | 3.71    | 6.71  |      |      | 4.71   | 3.29    | 1.14    | 6.43   |      | 2.43   | 0.71   | 1.57    | 4.43    | 1.71    | 6.57   | 6.57   |
| Maximum | 177.71 | 202.71 | 134.71 | 109.00  | 65.00   | 25.86 |      |      | 146.14 | 96.29   | 66.71   | 48.00  |      | 238.29 | 217.71 | 158.43  | 95.86   | 56.14   | 26.57  | 26.57  |
| N       | 62.00  | 563.00 | 992.00 | 1503.00 | 1140.00 | 80.00 |      |      | 678.00 | 1291.00 | 1474.00 | 161.00 |      | 515.00 | 917.00 | 1260.00 | 1567.00 | 1836.00 | 174.00 | 174.00 |

\* p < 0.05 test for difference in mean time to vaccination between girls and boys

### POLIO 3 (GIRLS)

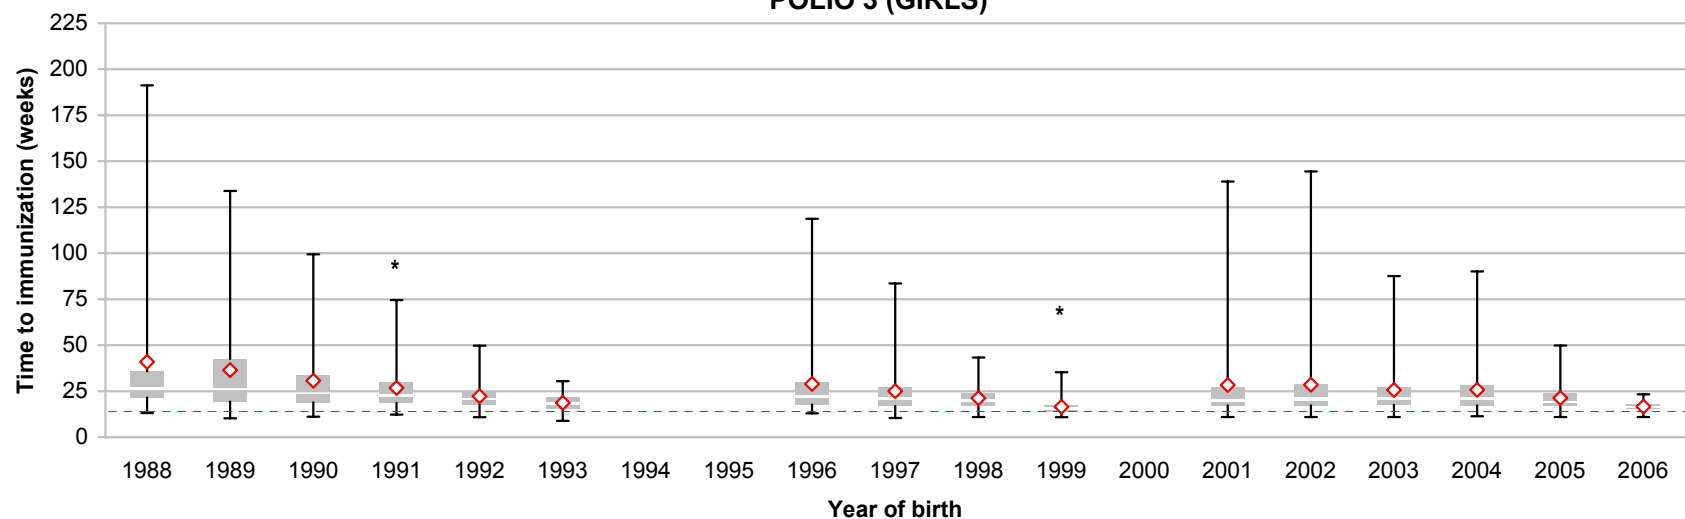

|         | <u>1988</u> | <u>1989</u> | <u>1990</u> | <u>1991</u> | <u>1992</u> | <u>1993</u> | <u>1994</u> | <u>1995</u> | <u>1996</u> | <u>1997</u> | <u>1998</u> | <u>1999</u> | <u>2000</u> | <u>2001</u> | <u>2002</u> | <u>2003</u> | <u>2004</u> | <u>2005</u> | <u>2006</u> |
|---------|-------------|-------------|-------------|-------------|-------------|-------------|-------------|-------------|-------------|-------------|-------------|-------------|-------------|-------------|-------------|-------------|-------------|-------------|-------------|
| 1st     | 13.14       | 10.29       | 11.14       | 12.29       | 10.86       | 8.86        |             |             | 13.00       | 10.43       | 11.00       | 10.86       |             | 11.00       | 11.00       | 11.00       | 11.43       | 11.00       | 11.00       |
| 25th    | 21.57       | 19.43       | 19.00       | 18.71       | 17.57       | 15.29       |             |             | 17.71       | 17.00       | 16.86       | 13.71       |             | 17.29       | 17.29       | 17.57       | 17.29       | 16.86       | 15.29       |
| 50th    | 26.14       | 25.86       | 24.29       | 22.86       | 20.71       | 18.14       |             |             | 22.00       | 20.86       | 19.57       | 15.71       |             | 20.00       | 20.71       | 21.00       | 21.00       | 19.14       | 16.29       |
| 75th    | 35.71       | 42.57       | 33.43       | 30.14       | 24.43       | 21.43       |             |             | 29.57       | 27.00       | 23.71       | 17.57       |             | 27.00       | 28.57       | 27.29       | 28.43       | 24.00       | 18.00       |
| 99th    | 191.29      | 133.86      | 99.43       | 74.57       | 49.71       | 30.43       |             |             | 118.71      | 83.57       | 43.29       | 35.29       |             | 139.00      | 144.43      | 87.57       | 90.14       | 49.86       | 23.29       |
| Mean    | 40.95       | 36.47       | 30.74       | 26.75       | 22.26       | 18.71       |             |             | 28.93       | 25.03       | 21.20       | 16.55       |             | 28.33       | 28.54       | 25.62       | 25.78       | 21.34       | 16.57       |
| SD      | 37.71       | 26.97       | 19.35       | 13.10       | 7.36        | 4.25        |             |             | 19.79       | 13.59       | 6.82        | 6.05        |             | 23.40       | 23.05       | 14.56       | 14.48       | 7.12        | 2.70        |
| Minimum | 13.14       | 9.43        | 8.86        | 6.29        | 8.29        | 8.86        |             |             | 9.57        | 8.43        | 5.00        | 10.86       |             | 7.14        | 5.00        | 8.86        | 5.57        | 7.86        | 10.86       |
| Maximum | 191.29      | 167.57      | 117.43      | 105.57      | 60.57       | 30.43       |             |             | 127.86      | 125.86      | 84.43       | 73.57       |             | 161.14      | 178.71      | 142.29      | 108.14      | 62.14       | 25.14       |
| N       | 45          | 447         | 822         | 1218        | 759         | 28          |             |             | 519         | 1038        | 1006        | 80          |             | 481         | 833         | 977         | 1313        | 1327        | 79          |

\* p < 0.05 test for difference in mean time to vaccination between girls and boys



### POLIO 3 (BOYS)

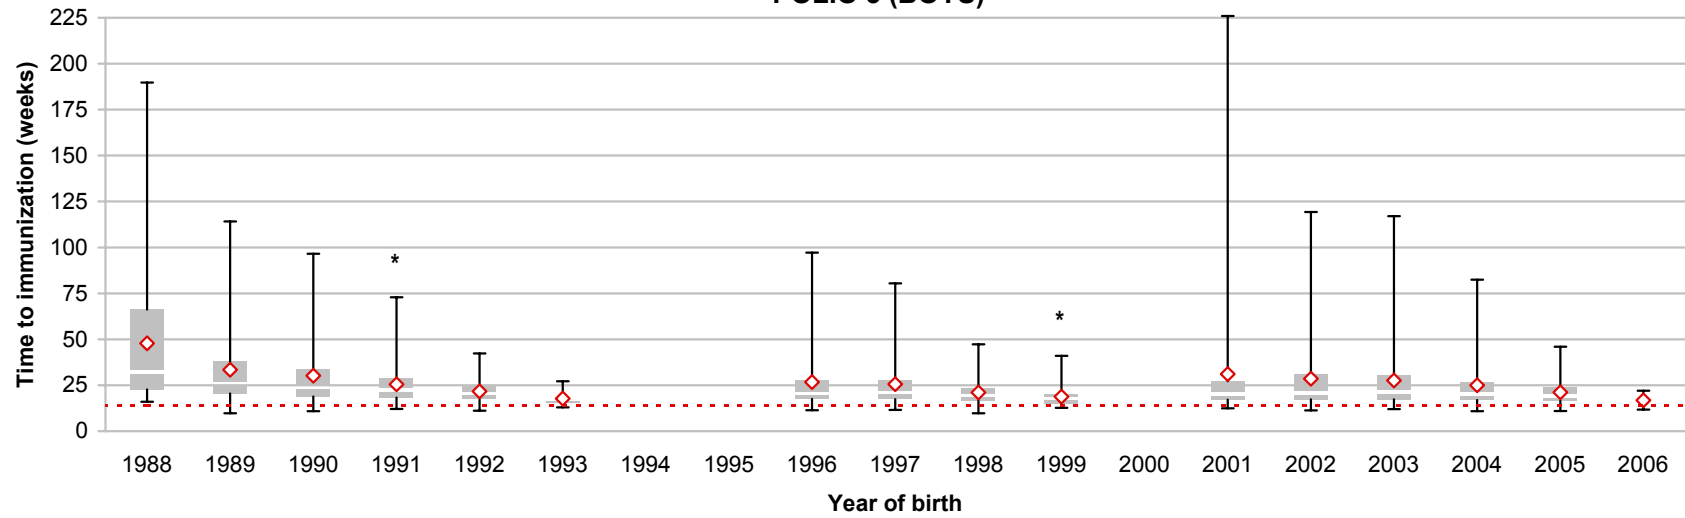

|         | 1988   | 1989   | 1990   | 1991   | 1992  | 1993  | 1994 | 1995 | 1996   | 1997   | 1998  | 1999  | 2000 | 2001   | 2002   | 2003   | 2004   | 2005  | 2006  |
|---------|--------|--------|--------|--------|-------|-------|------|------|--------|--------|-------|-------|------|--------|--------|--------|--------|-------|-------|
| 1st     | 16.00  | 9.71   | 10.86  | 12.14  | 11.14 | 13.00 |      |      | 11.43  | 11.57  | 9.71  | 12.71 |      | 12.43  | 11.29  | 12.00  | 10.86  | 11.00 | 11.71 |
| 25th    | 22.71  | 20.57  | 18.86  | 18.29  | 17.43 | 15.57 |      |      | 17.57  | 17.43  | 16.71 | 15.14 |      | 17.14  | 17.29  | 17.29  | 17.00  | 16.57 | 15.86 |
| 50th    | 32.29  | 25.71  | 24.00  | 22.57  | 20.43 | 17.43 |      |      | 20.57  | 21.14  | 19.57 | 17.86 |      | 20.29  | 20.86  | 21.29  | 20.14  | 19.00 | 16.86 |
| 75th    | 66.14  | 37.71  | 33.57  | 28.86  | 24.57 | 18.43 |      |      | 28.00  | 27.86  | 23.43 | 20.14 |      | 27.14  | 30.86  | 30.29  | 26.57  | 23.86 | 17.71 |
| 99th    | 189.71 | 114.14 | 96.57  | 72.86  | 42.29 | 27.14 |      |      | 97.14  | 80.43  | 47.29 | 41.00 |      | 226.00 | 119.29 | 117.00 | 82.43  | 46.00 | 22.00 |
| Mean    | 47.85  | 33.40  | 30.18  | 25.49  | 21.70 | 17.73 |      |      | 26.74  | 25.62  | 21.09 | 18.85 |      | 31.11  | 28.55  | 27.58  | 25.02  | 21.20 | 16.84 |
| SD      | 35.55  | 21.88  | 18.34  | 11.24  | 6.42  | 3.35  |      |      | 17.23  | 13.88  | 6.89  | 6.44  |      | 33.99  | 20.43  | 18.41  | 14.10  | 6.98  | 1.89  |
| Minimum | 16.00  | 4.29   | 7.14   | 0.29   | 0.71  | 12.14 |      |      | 10.29  | 9.29   | 5.86  | 12.43 |      | 1.29   | 5.57   | 1.71   | 6.86   | 6.71  | 11.14 |
| Maximum | 189.71 | 172.71 | 139.71 | 101.57 | 55.29 | 27.14 |      |      | 137.29 | 103.00 | 79.43 | 67.71 |      | 235.14 | 222.00 | 157.29 | 101.14 | 57.14 | 25.86 |
| N       | 61     | 534    | 932    | 1377   | 873   | 42    |      |      | 639    | 1220   | 1222  | 84    |      | 502    | 891    | 1200   | 1487   | 1550  | 80    |

\* p < 0.05 test for difference in mean time to vaccination between girls and boys

### DPT 1 (GIRLS)

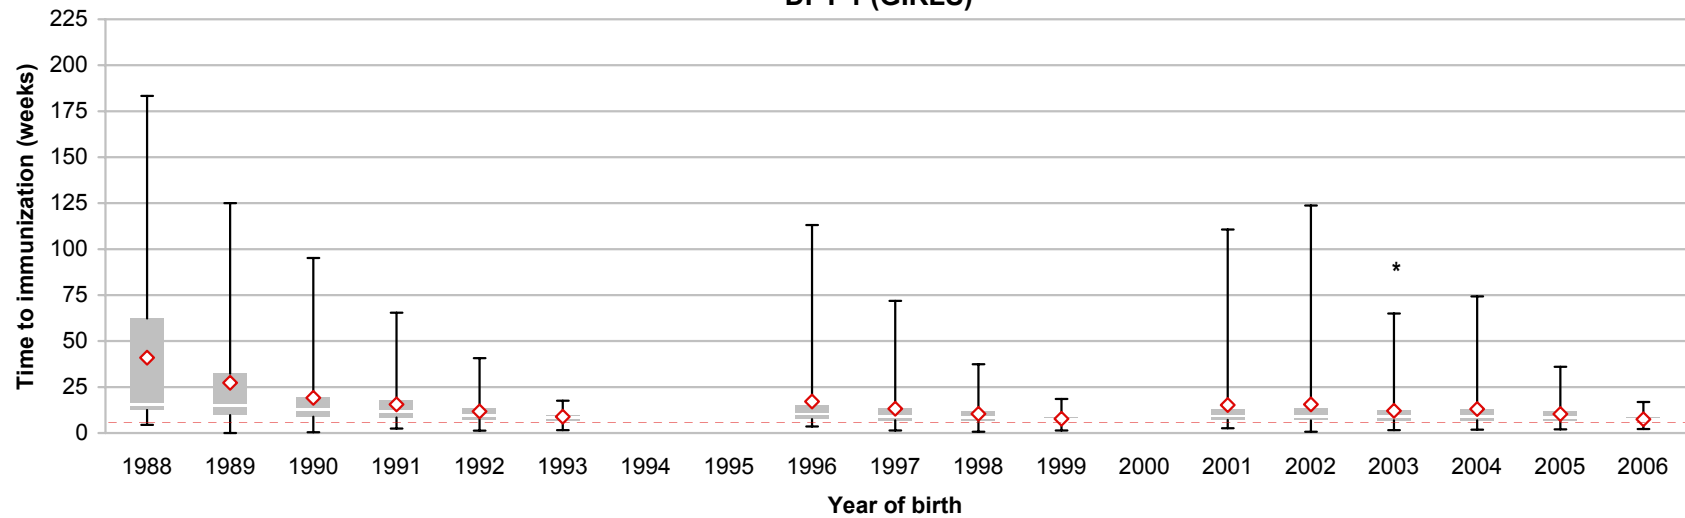

|         | 1988   | 1989   | 1990   | 1991  | 1992  | 1993  | 1994 | 1995 | 1996   | 1997   | 1998  | 1999  | 2000 | 2001   | 2002   | 2003   | 2004   | 2005  | 2006  |
|---------|--------|--------|--------|-------|-------|-------|------|------|--------|--------|-------|-------|------|--------|--------|--------|--------|-------|-------|
| 1st     | 4.43   | 0.00   | 0.43   | 2.43  | 1.29  | 1.57  |      |      | 3.57   | 1.43   | 0.71  | 1.43  |      | 2.57   | 0.71   | 1.57   | 1.86   | 2.00  | 2.14  |
| 25th    | 12.57  | 9.71   | 8.86   | 8.43  | 7.29  | 6.71  |      |      | 7.57   | 7.00   | 6.86  | 6.29  |      | 7.14   | 6.86   | 7.00   | 7.00   | 6.86  | 6.14  |
| 50th    | 15.29  | 14.71  | 13.00  | 12.00 | 9.71  | 8.57  |      |      | 10.29  | 9.14   | 8.57  | 7.14  |      | 9.14   | 8.86   | 9.00   | 9.00   | 8.43  | 6.86  |
| 75th    | 62.29  | 32.29  | 19.86  | 18.00 | 13.86 | 10.00 |      |      | 15.43  | 13.43  | 11.71 | 8.43  |      | 13.29  | 13.29  | 12.29  | 13.14  | 11.86 | 8.29  |
| 99th    | 183.29 | 125.00 | 95.14  | 65.43 | 40.71 | 17.57 |      |      | 113.14 | 71.86  | 37.43 | 18.57 |      | 110.71 | 123.71 | 65.00  | 74.29  | 36.00 | 16.86 |
| Mean    | 41.02  | 27.34  | 19.15  | 15.53 | 11.70 | 8.89  |      |      | 17.17  | 13.25  | 10.47 | 7.78  |      | 15.22  | 15.56  | 12.09  | 13.08  | 10.32 | 7.48  |
| SD      | 48.63  | 29.59  | 19.04  | 11.93 | 7.20  | 3.39  |      |      | 19.98  | 13.42  | 6.58  | 3.88  |      | 23.33  | 20.86  | 12.37  | 12.84  | 6.11  | 2.75  |
| Minimum | 4.43   | 0.00   | 0.00   | 0.00  | 0.14  | 0.43  |      |      | 0.00   | 0.00   | 0.00  | 0.14  |      | 0.71   | 0.00   | 0.00   | 0.00   | 0.00  | 0.29  |
| Maximum | 183.29 | 160.29 | 125.57 | 95.29 | 63.71 | 17.57 |      |      | 126.14 | 115.00 | 83.86 | 60.43 |      | 249.00 | 188.57 | 138.43 | 101.14 | 57.71 | 18.71 |
| N       | 50     | 500    | 919    | 1388  | 1226  | 115   |      |      | 578    | 1142   | 1440  | 281   |      | 513    | 888    | 1064   | 1429   | 1796  | 282   |

\* p < 0.05 test for difference in mean time to vaccination between girls and boys

### DPT 1 (BOYS)

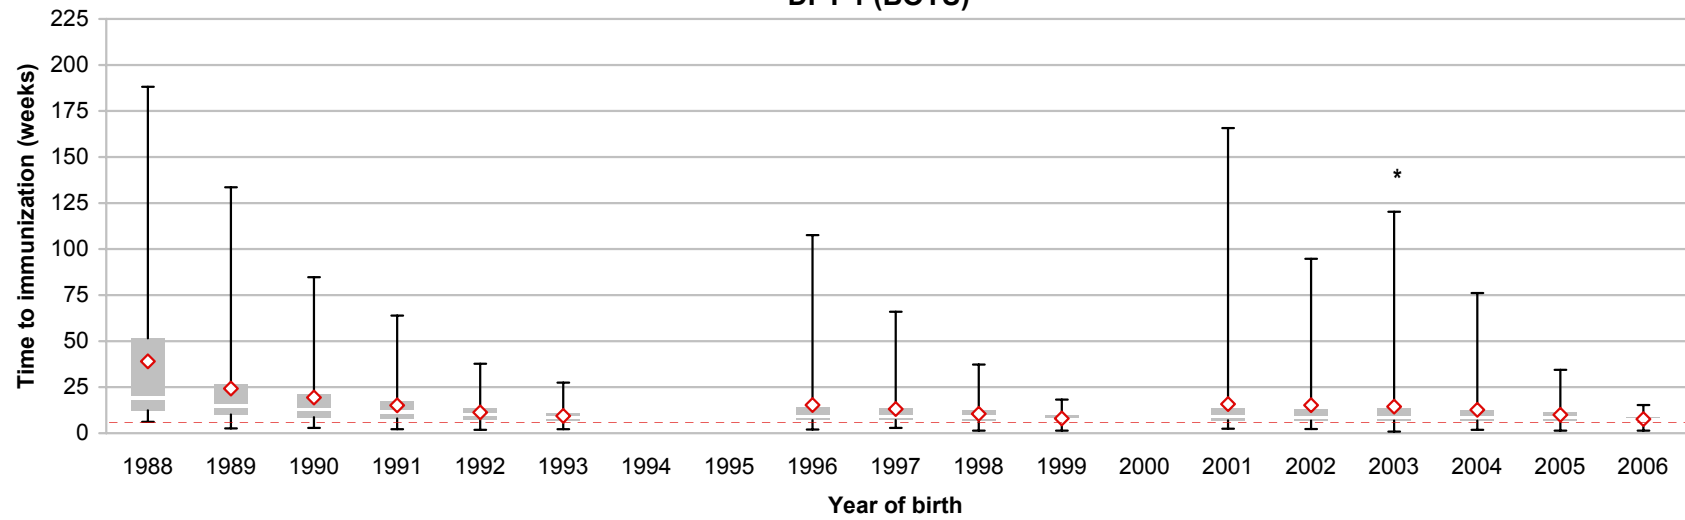

|         | 1988   | 1989   | 1990   | 1991  | 1992  | 1993  | 1994 | 1995 | 1996   | 1997  | 1998  | 1999  | 2000 | 2001   | 2002   | 2003   | 2004   | 2005  | 2006  |       |
|---------|--------|--------|--------|-------|-------|-------|------|------|--------|-------|-------|-------|------|--------|--------|--------|--------|-------|-------|-------|
| 1st     | 6.14   | 2.57   | 2.86   | 2.14  | 1.86  | 2.14  |      |      | 2.00   | 2.86  | 1.43  | 1.43  |      | 2.43   | 2.29   | 0.86   | 1.86   | 1.43  | 1.43  |       |
| 25th    | 12.43  | 10.14  | 8.71   | 8.00  | 7.14  | 6.86  |      |      | 7.14   | 7.14  | 6.86  | 6.43  |      | 7.00   | 6.86   | 6.86   | 6.86   | 6.86  | 6.43  | 6.43  |
| 50th    | 19.14  | 14.86  | 13.00  | 11.57 | 9.86  | 8.43  |      |      | 9.14   | 9.14  | 8.86  | 7.29  |      | 9.14   | 8.57   | 8.71   | 8.57   | 8.43  | 8.43  | 7.14  |
| 75th    | 51.57  | 26.29  | 21.29  | 17.29 | 13.43 | 10.57 |      |      | 14.29  | 13.43 | 12.43 | 9.57  |      | 13.86  | 12.86  | 13.86  | 12.71  | 11.14 | 11.14 | 8.57  |
| 99th    | 188.14 | 133.57 | 84.71  | 63.86 | 37.71 | 27.43 |      |      | 107.57 | 66.00 | 37.29 | 18.29 |      | 165.71 | 94.71  | 120.29 | 76.14  | 34.43 | 34.43 | 15.29 |
| Mean    | 38.98  | 24.23  | 19.39  | 15.09 | 11.31 | 9.36  |      |      | 15.30  | 13.09 | 10.51 | 7.96  |      | 15.84  | 15.24  | 14.44  | 12.68  | 9.99  | 9.99  | 7.68  |
| SD      | 44.49  | 25.65  | 18.43  | 11.60 | 6.53  | 4.21  |      |      | 18.38  | 12.10 | 6.36  | 3.29  |      | 23.47  | 21.58  | 18.41  | 12.75  | 5.84  | 5.84  | 2.68  |
| Minimum | 4.14   | 0.71   | 0.43   | 0.00  | 0.14  | 1.71  |      |      | 0.00   | 0.00  | 0.00  | 0.00  |      | 0.57   | 0.00   | 0.00   | 0.00   | 0.00  | 0.00  | 0.57  |
| Maximum | 188.14 | 188.43 | 130.29 | 98.00 | 62.00 | 27.43 |      |      | 141.86 | 99.14 | 64.57 | 38.00 |      | 234.29 | 221.86 | 153.43 | 106.00 | 66.71 | 66.71 | 18.29 |
| N       | 67     | 582    | 1020   | 1592  | 1407  | 156   |      |      | 706    | 1338  | 1700  | 266   |      | 533    | 943    | 1292   | 1632   | 2040  | 2040  | 297   |

\* p < 0.05 test for difference in mean time to vaccination between girls and boys

### DPT 2 (GIRLS)

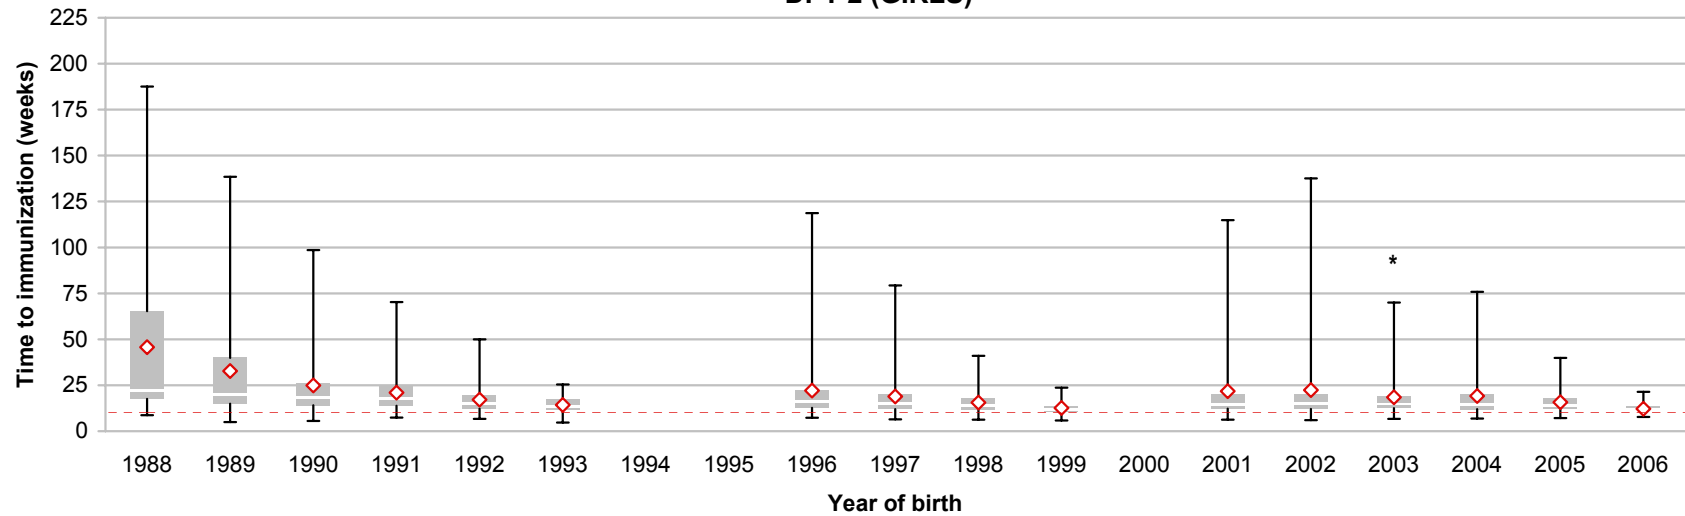

|         | 1988   | 1989   | 1990   | 1991  | 1992  | 1993  | 1994 | 1995 | 1996   | 1997  | 1998  | 1999  | 2000 | 2001   | 2002   | 2003   | 2004   | 2005  | 2006  |
|---------|--------|--------|--------|-------|-------|-------|------|------|--------|-------|-------|-------|------|--------|--------|--------|--------|-------|-------|
| 1st     | 8.71   | 5.00   | 5.57   | 7.43  | 6.71  | 4.71  |      |      | 7.29   | 6.43  | 6.29  | 5.86  |      | 6.29   | 6.00   | 6.71   | 6.86   | 7.14  | 7.71  |
| 25th    | 17.57  | 15.00  | 14.14  | 13.86 | 12.29 | 12.00 |      |      | 12.71  | 12.00 | 11.71 | 10.57 |      | 12.29  | 12.14  | 12.57  | 12.00  | 12.00 | 11.00 |
| 50th    | 22.14  | 19.86  | 18.29  | 17.57 | 15.14 | 13.57 |      |      | 16.00  | 14.86 | 14.00 | 11.71 |      | 14.43  | 15.00  | 14.86  | 14.57  | 13.86 | 11.43 |
| 75th    | 65.29  | 39.86  | 26.00  | 24.29 | 19.57 | 17.29 |      |      | 22.14  | 20.00 | 17.71 | 13.71 |      | 20.14  | 20.29  | 19.29  | 20.29  | 17.86 | 13.14 |
| 99th    | 187.57 | 138.43 | 98.57  | 70.29 | 50.00 | 25.43 |      |      | 118.71 | 79.29 | 41.00 | 23.71 |      | 114.86 | 137.57 | 70.00  | 75.86  | 39.86 | 21.43 |
| Mean    | 45.69  | 32.77  | 24.94  | 20.95 | 17.19 | 14.31 |      |      | 22.11  | 18.89 | 15.63 | 12.65 |      | 21.75  | 22.39  | 18.46  | 19.12  | 15.75 | 12.20 |
| SD      | 48.61  | 30.21  | 19.07  | 11.95 | 7.71  | 4.03  |      |      | 18.61  | 12.81 | 6.34  | 5.47  |      | 22.50  | 22.16  | 12.41  | 13.13  | 6.15  | 2.64  |
| Minimum | 8.71   | 3.71   | 3.00   | 2.86  | 4.14  | 4.71  |      |      | 4.00   | 3.14  | 0.00  | 5.00  |      | 5.14   | 2.43   | 1.29   | 4.14   | 3.86  | 6.43  |
| Maximum | 187.57 | 175.71 | 138.29 | 99.43 | 61.71 | 25.43 |      |      | 134.86 | 96.71 | 79.43 | 69.14 |      | 191.00 | 173.43 | 152.14 | 104.43 | 60.14 | 24.86 |
| N       | 49     | 481    | 889    | 1334  | 1012  | 67    |      |      | 554    | 1110  | 1251  | 166   |      | 503    | 874    | 1033   | 1386   | 1608  | 156   |

\* p < 0.05 test for difference in mean time to vaccination between girls and boys

### DPT 2 (BOYS)

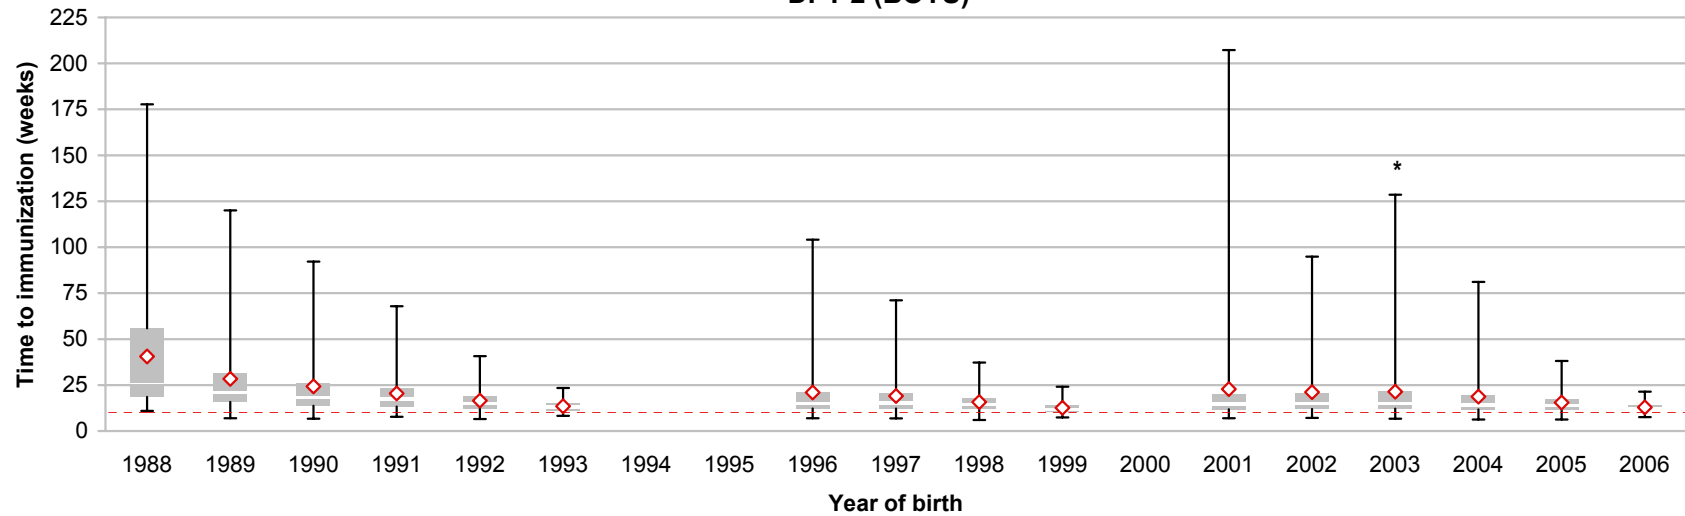

|         | 1988   | 1989   | 1990   | 1991   | 1992  | 1993  | 1994 | 1995 | 1996   | 1997  | 1998  | 1999  | 2000 | 2001   | 2002   | 2003   | 2004  | 2005  | 2006  |
|---------|--------|--------|--------|--------|-------|-------|------|------|--------|-------|-------|-------|------|--------|--------|--------|-------|-------|-------|
| 1st     | 11.00  | 7.00   | 6.71   | 7.71   | 6.57  | 8.29  |      |      | 7.00   | 6.86  | 6.00  | 7.43  |      | 7.00   | 7.14   | 6.71   | 6.29  | 6.29  | 7.57  |
| 25th    | 18.57  | 15.86  | 13.71  | 13.29  | 12.29 | 11.14 |      |      | 12.29  | 12.29 | 11.86 | 10.71 |      | 11.86  | 12.00  | 12.14  | 11.71 | 11.71 | 11.14 |
| 50th    | 25.00  | 20.71  | 18.29  | 17.43  | 15.00 | 13.14 |      |      | 15.14  | 15.14 | 14.29 | 11.86 |      | 14.71  | 14.71  | 14.86  | 14.29 | 13.86 | 12.14 |
| 75th    | 55.86  | 31.43  | 26.29  | 23.00  | 19.14 | 15.14 |      |      | 21.14  | 20.43 | 18.00 | 14.00 |      | 20.14  | 20.57  | 21.43  | 19.71 | 17.29 | 14.00 |
| 99th    | 177.71 | 120.00 | 92.14  | 67.86  | 40.71 | 23.43 |      |      | 104.14 | 71.14 | 37.29 | 24.14 |      | 207.29 | 94.86  | 128.57 | 81.14 | 38.14 | 21.43 |
| Mean    | 40.54  | 28.34  | 24.30  | 20.45  | 16.55 | 13.51 |      |      | 20.94  | 19.08 | 15.77 | 12.66 |      | 22.83  | 21.11  | 21.38  | 18.69 | 15.52 | 12.89 |
| SD      | 35.92  | 21.98  | 17.87  | 11.39  | 6.63  | 3.37  |      |      | 17.82  | 12.31 | 6.19  | 3.98  |      | 29.65  | 18.46  | 20.09  | 13.10 | 6.11  | 2.81  |
| Minimum | 11.00  | 3.43   | 2.14   | 1.00   | 3.71  | 6.71  |      |      | 4.71   | 3.29  | 1.14  | 6.43  |      | 6.29   | 0.71   | 1.14   | 4.43  | 1.71  | 5.57  |
| Maximum | 177.71 | 193.57 | 134.71 | 109.00 | 67.00 | 25.86 |      |      | 146.14 | 96.29 | 66.71 | 48.00 |      | 238.29 | 217.71 | 158.43 | 95.14 | 56.14 | 26.57 |
| N       | 62     | 561    | 993    | 1503   | 1146  | 80    |      |      | 682    | 1299  | 1490  | 164   |      | 524    | 922    | 1278   | 1586  | 1852  | 173   |

\* p < 0.05 test for difference in mean time to vaccination between girls and boys

### DPT 3 (GIRLS)

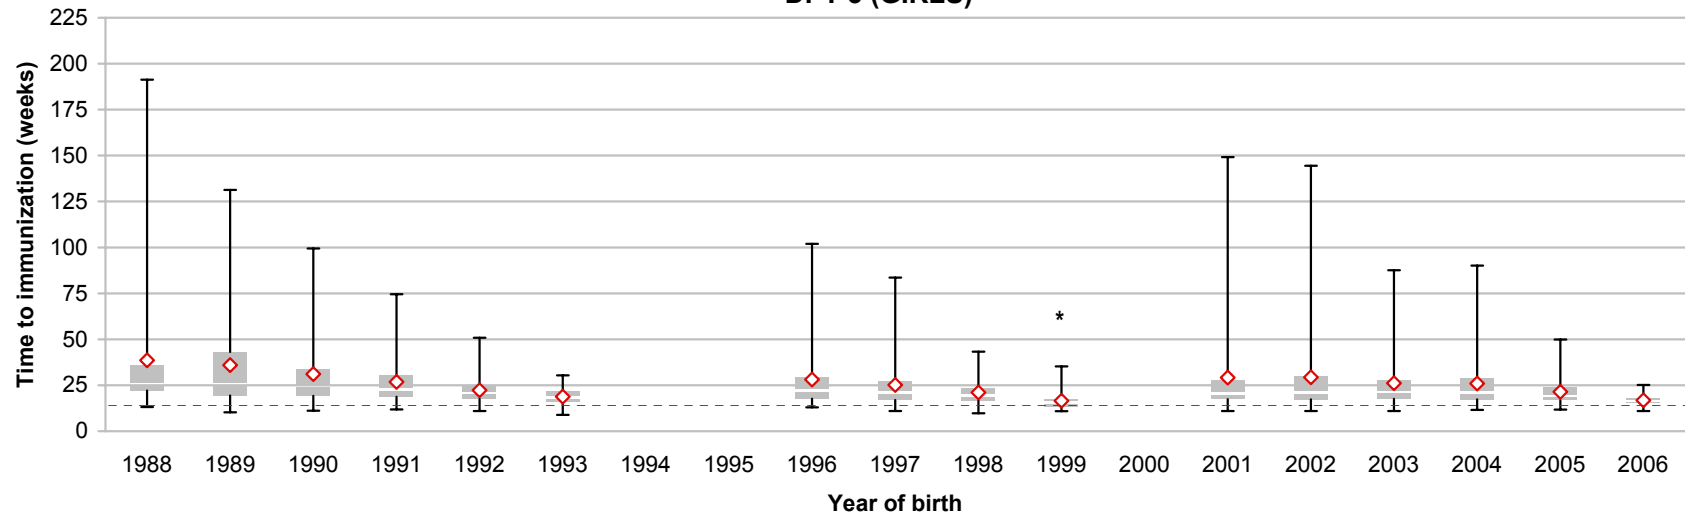

|         | <u>1988</u> | <u>1989</u> | <u>1990</u> | <u>1991</u> | <u>1992</u> | <u>1993</u> | <u>1994</u> | <u>1995</u> | <u>1996</u> | <u>1997</u> | <u>1998</u> | <u>1999</u> | <u>2000</u> | <u>2001</u> | <u>2002</u> | <u>2003</u> | <u>2004</u> | <u>2005</u> | <u>2006</u> |
|---------|-------------|-------------|-------------|-------------|-------------|-------------|-------------|-------------|-------------|-------------|-------------|-------------|-------------|-------------|-------------|-------------|-------------|-------------|-------------|
| 1st     | 13.14       | 10.29       | 11.14       | 11.86       | 11.00       | 8.86        |             |             | 13.00       | 11.00       | 9.71        | 10.86       |             | 11.00       | 11.00       | 11.00       | 11.57       | 11.71       | 11.00       |
| 25th    | 22.14       | 19.43       | 19.29       | 18.71       | 17.57       | 16.14       |             |             | 17.71       | 17.00       | 16.71       | 13.71       |             | 17.43       | 17.29       | 17.57       | 17.29       | 16.86       | 15.43       |
| 50th    | 25.43       | 25.86       | 24.57       | 22.86       | 20.86       | 18.14       |             |             | 22.29       | 21.00       | 19.43       | 15.71       |             | 20.43       | 21.00       | 21.29       | 21.00       | 19.14       | 16.43       |
| 75th    | 35.71       | 43.14       | 33.86       | 30.43       | 24.57       | 21.43       |             |             | 29.43       | 27.14       | 23.57       | 17.71       |             | 27.43       | 29.86       | 27.71       | 28.57       | 24.00       | 18.00       |
| 99th    | 191.29      | 131.29      | 99.43       | 74.57       | 50.86       | 30.43       |             |             | 102.00      | 83.57       | 43.29       | 35.29       |             | 149.14      | 144.43      | 87.57       | 90.14       | 49.86       | 25.14       |
| Mean    | 38.60       | 35.99       | 31.12       | 26.78       | 22.27       | 18.79       |             |             | 28.08       | 25.19       | 21.08       | 16.52       |             | 29.18       | 29.36       | 26.09       | 25.93       | 21.42       | 16.85       |
| SD      | 32.62       | 26.32       | 19.50       | 13.13       | 7.35        | 4.19        |             |             | 17.60       | 13.66       | 6.75        | 6.06        |             | 24.83       | 23.84       | 14.69       | 14.67       | 7.06        | 2.46        |
| Minimum | 13.14       | 9.43        | 8.86        | 6.29        | 8.29        | 8.86        |             |             | 9.57        | 8.43        | 5.00        | 8.71        |             | 7.14        | 5.00        | 6.29        | 5.57        | 7.86        | 10.86       |
| Maximum | 191.29      | 184.57      | 117.43      | 109.86      | 60.57       | 30.43       |             |             | 127.86      | 125.86      | 84.43       | 73.57       |             | 178.00      | 178.71      | 142.29      | 108.14      | 62.43       | 25.14       |
| N       | 41          | 449         | 821         | 1215        | 768         | 28          |             |             | 519         | 1041        | 1019        | 80          |             | 494         | 841         | 984         | 1330        | 1340        | 77          |

\* p < 0.05 test for difference in mean time to vaccination between girls and boys

### DPT 3 (BOYS)

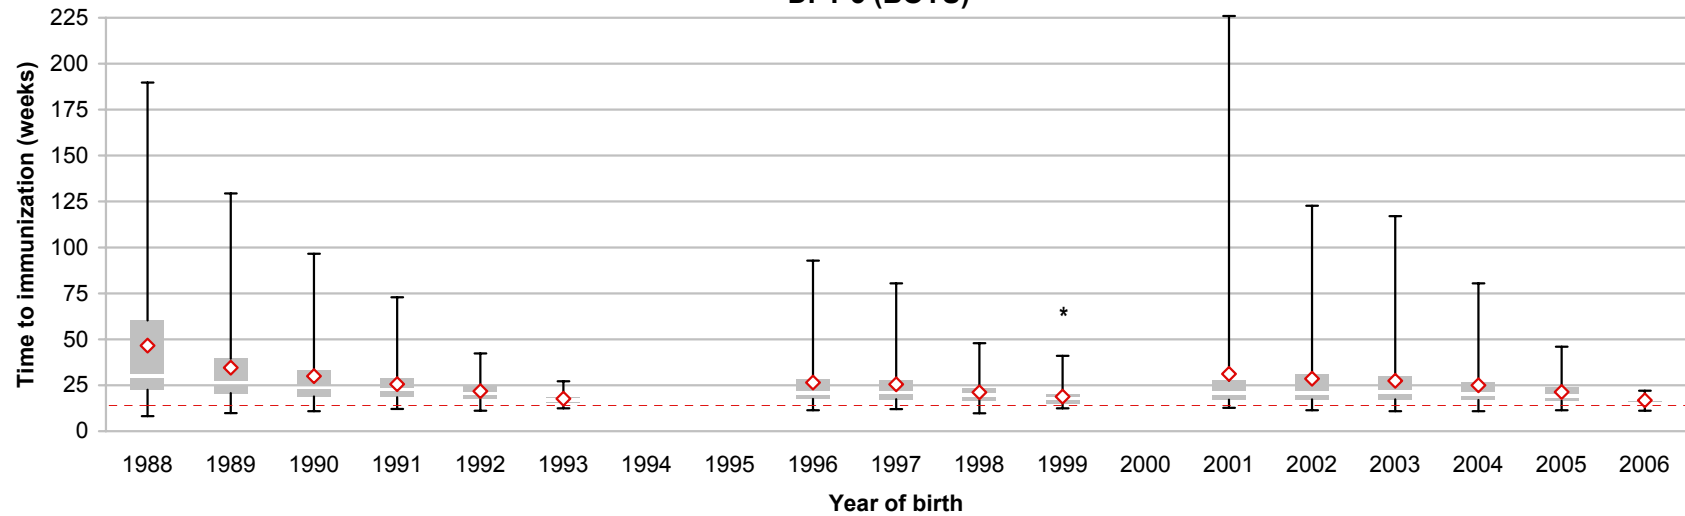

|         | 1988   | 1989   | 1990   | 1991   | 1992  | 1993  | 1994 | 1995 | 1996   | 1997   | 1998  | 1999  | 2000 | 2001   | 2002   | 2003   | 2004   | 2005  | 2006  |
|---------|--------|--------|--------|--------|-------|-------|------|------|--------|--------|-------|-------|------|--------|--------|--------|--------|-------|-------|
| 1st     | 8.14   | 9.86   | 10.86  | 12.14  | 11.14 | 12.43 |      |      | 11.43  | 12.00  | 9.71  | 12.43 |      | 12.71  | 11.43  | 10.86  | 10.86  | 11.43 | 11.14 |
| 25th    | 22.57  | 20.71  | 18.86  | 18.43  | 17.43 | 15.43 |      |      | 17.57  | 17.43  | 16.71 | 15.14 |      | 17.14  | 17.29  | 17.29  | 17.00  | 16.57 | 15.86 |
| 50th    | 30.00  | 26.29  | 24.00  | 22.71  | 20.43 | 17.00 |      |      | 20.71  | 21.29  | 19.71 | 17.86 |      | 20.71  | 20.86  | 21.29  | 20.14  | 19.14 | 17.00 |
| 75th    | 60.29  | 39.43  | 33.29  | 28.71  | 24.57 | 18.43 |      |      | 28.00  | 27.86  | 23.43 | 20.14 |      | 27.43  | 30.71  | 29.86  | 26.57  | 23.86 | 17.71 |
| 99th    | 189.71 | 129.43 | 96.57  | 72.86  | 42.29 | 27.14 |      |      | 92.86  | 80.43  | 47.86 | 41.00 |      | 226.00 | 122.71 | 117.00 | 80.43  | 46.00 | 22.00 |
| Mean    | 46.60  | 34.56  | 29.99  | 25.61  | 21.76 | 17.66 |      |      | 26.44  | 25.50  | 21.16 | 18.77 |      | 31.19  | 28.58  | 27.41  | 24.97  | 21.30 | 16.85 |
| SD      | 38.59  | 23.17  | 17.98  | 11.36  | 6.51  | 3.40  |      |      | 15.87  | 13.52  | 6.99  | 6.48  |      | 33.41  | 20.74  | 18.28  | 13.84  | 6.98  | 1.87  |
| Minimum | 8.14   | 4.29   | 7.14   | 0.29   | 0.71  | 8.00  |      |      | 10.29  | 9.29   | 5.86  | 7.00  |      | 1.29   | 5.57   | 1.71   | 6.86   | 6.71  | 9.71  |
| Maximum | 189.71 | 172.71 | 139.71 | 101.57 | 55.29 | 27.14 |      |      | 114.57 | 103.00 | 79.43 | 67.71 |      | 235.14 | 222.00 | 162.29 | 101.14 | 57.14 | 25.86 |
| N       | 61     | 537    | 932    | 1372   | 881   | 43    |      |      | 638    | 1225   | 1226  | 86    |      | 507    | 893    | 1214   | 1497   | 1566  | 80    |

\* p < 0.05 test for difference in mean time to vaccination between girls and boys

### MEASLES (GIRLS)

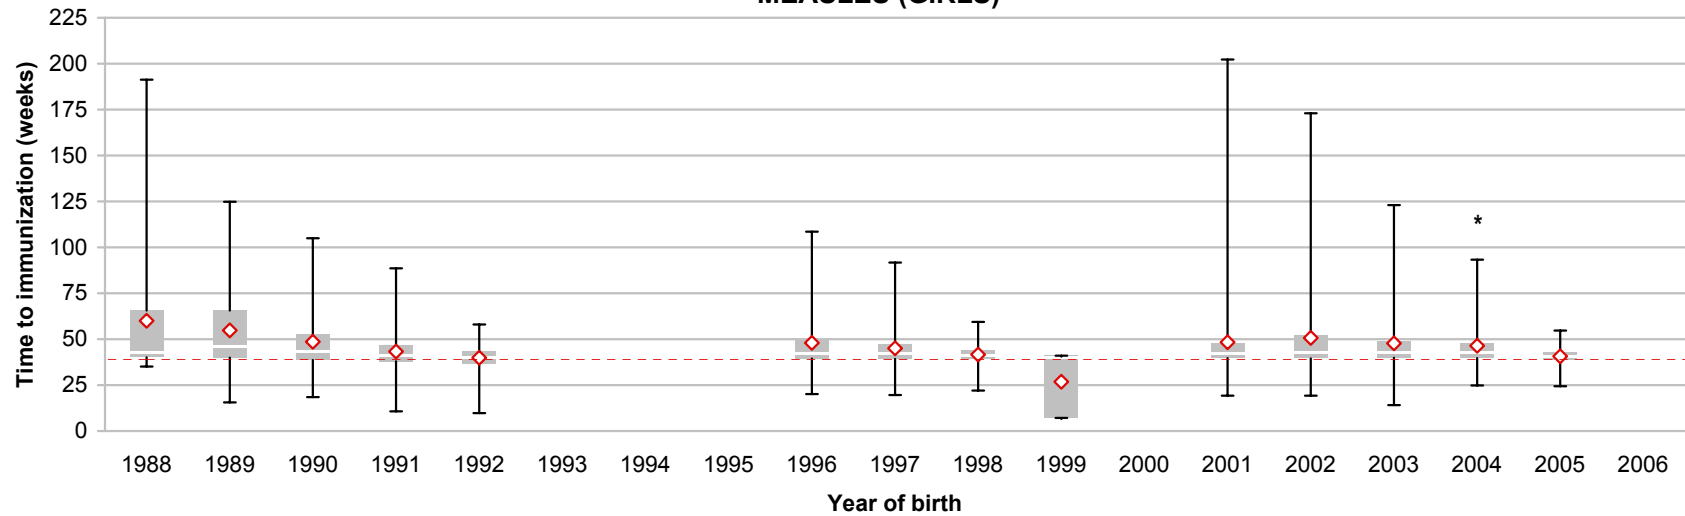

|         | 1988   | 1989   | 1990   | 1991   | 1992   | 1993 | 1994 | 1995 | 1996   | 1997   | 1998   | 1999  | 2000 | 2001   | 2002   | 2003   | 2004    | 2005   | 2006 |
|---------|--------|--------|--------|--------|--------|------|------|------|--------|--------|--------|-------|------|--------|--------|--------|---------|--------|------|
| 1st     | 35.14  | 15.57  | 18.43  | 10.71  | 9.71   |      |      |      | 20.14  | 19.57  | 22.00  | 7.14  |      | 19.29  | 19.29  | 14.14  | 24.86   | 24.43  |      |
| 25th    | 40.14  | 40.00  | 38.71  | 38.00  | 36.57  |      |      |      | 39.43  | 39.29  | 39.14  | 7.14  |      | 39.71  | 39.57  | 39.86  | 39.71   | 38.57  |      |
| 50th    | 42.71  | 46.00  | 43.00  | 41.43  | 39.86  |      |      |      | 42.29  | 42.43  | 41.14  | 39.86 |      | 42.29  | 42.71  | 42.57  | 42.71   | 40.57  |      |
| 75th    | 65.57  | 65.57  | 52.43  | 46.86  | 43.29  |      |      |      | 49.57  | 47.29  | 44.29  | 41.00 |      | 47.86  | 52.14  | 48.57  | 47.86   | 43.00  |      |
| 99th    | 191.29 | 124.86 | 105.00 | 88.57  | 58.00  |      |      |      | 108.57 | 91.71  | 59.43  | 41.00 |      | 202.29 | 173.00 | 123.00 | 93.29   | 54.71  |      |
| Mean    | 60.00  | 54.80  | 48.61  | 43.28  | 39.92  |      |      |      | 47.97  | 44.99  | 41.67  | 26.80 |      | 48.36  | 50.74  | 47.76  | 46.47   | 40.70  |      |
| SD      | 34.21  | 24.59  | 17.59  | 11.50  | 7.70   |      |      |      | 16.93  | 11.72  | 6.44   | 20.09 |      | 25.35  | 23.90  | 17.71  | 12.54   | 5.09   |      |
| Minimum | 34.00  | 0.00   | 1.57   | 1.29   | 2.00   |      |      |      | 9.00   | 0.86   | 1.29   | 7.14  |      | 8.86   | 11.57  | 2.71   | 9.29    | 10.00  |      |
| Maximum | 191.29 | 173.86 | 167.86 | 96.86  | 67.86  |      |      |      | 129.43 | 101.00 | 87.57  | 41.00 |      | 250.71 | 197.00 | 153.71 | 112.43  | 65.29  |      |
| N       | 34.00  | 370.00 | 658.00 | 873.00 | 277.00 |      |      |      | 444.00 | 893.00 | 441.00 | 3.00  |      | 459.00 | 789.00 | 913.00 | 1225.00 | 638.00 |      |

\* p < 0.05 test for difference in mean time to vaccination between girls and boys



**MEASLES (BOYS)**

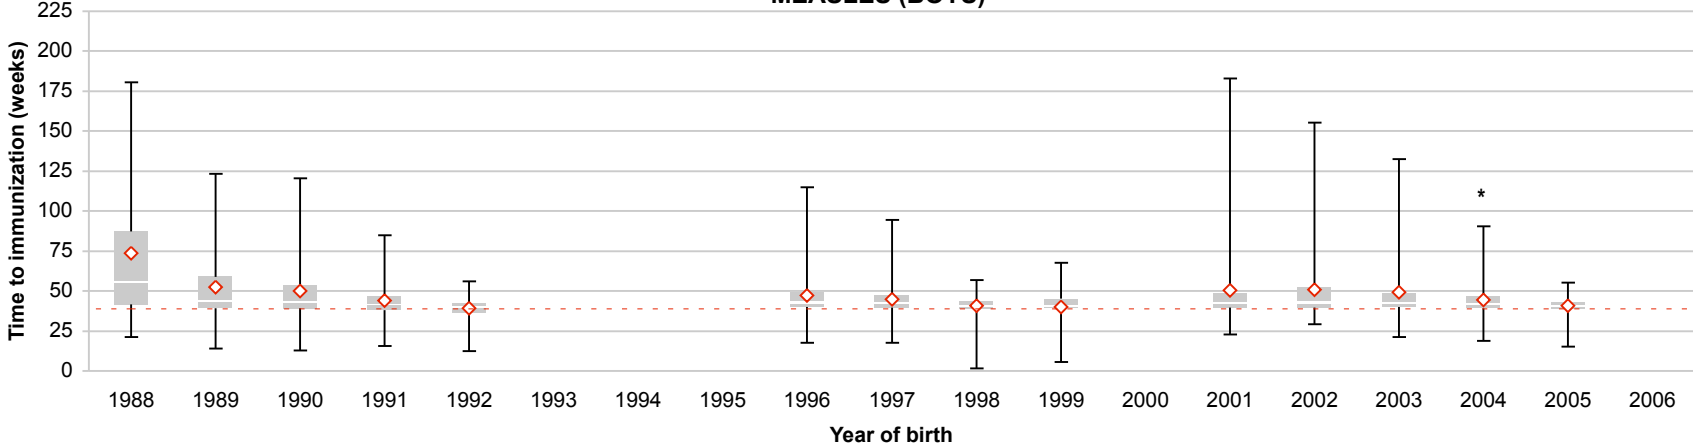

|         | 1988   | 1989   | 1990   | 1991    | 1992   | 1993 | 1994 | 1995 | 1996   | 1997    | 1998   | 1999  | 2000 | 2001   | 2002   | 2003    | 2004    | 2005   | 2006 |
|---------|--------|--------|--------|---------|--------|------|------|------|--------|---------|--------|-------|------|--------|--------|---------|---------|--------|------|
| 1st     | 21.14  | 13.86  | 12.71  | 15.43   | 12.29  |      |      |      | 17.43  | 17.57   | 1.57   | 5.57  |      | 22.86  | 29.14  | 21.14   | 18.71   | 15.29  |      |
| 25th    | 41.57  | 39.14  | 39.14  | 38.00   | 36.43  |      |      |      | 39.86  | 39.57   | 38.86  | 39.43 |      | 39.57  | 39.57  | 39.86   | 39.29   | 39.00  |      |
| 50th    | 55.71  | 43.71  | 43.29  | 41.57   | 40.00  |      |      |      | 42.71  | 42.43   | 40.71  | 40.57 |      | 42.86  | 42.86  | 42.71   | 41.71   | 40.71  |      |
| 75th    | 87.29  | 59.00  | 54.00  | 47.00   | 42.57  |      |      |      | 49.14  | 47.43   | 43.71  | 45.29 |      | 48.86  | 51.86  | 48.86   | 46.57   | 43.14  |      |
| 99th    | 180.71 | 123.43 | 120.43 | 84.86   | 56.00  |      |      |      | 114.86 | 94.29   | 56.71  | 67.71 |      | 183.00 | 155.14 | 132.43  | 90.43   | 55.14  |      |
| Mean    | 73.80  | 52.58  | 50.09  | 44.08   | 39.16  |      |      |      | 47.39  | 44.84   | 40.79  | 39.92 |      | 50.45  | 50.88  | 49.15   | 44.43   | 40.67  |      |
| SD      | 43.25  | 23.91  | 19.65  | 11.56   | 7.73   |      |      |      | 16.54  | 11.51   | 7.69   | 17.03 |      | 26.95  | 22.15  | 20.80   | 11.50   | 6.03   |      |
| Minimum | 21.14  | 3.43   | 0.00   | 1.71    | 3.86   |      |      |      | 10.71  | 0.14    | 0.00   | 5.57  |      | 5.14   | 5.57   | 3.29    | 2.43    | 4.57   |      |
| Maximum | 180.71 | 193.57 | 144.71 | 117.14  | 63.14  |      |      |      | 137.71 | 106.57  | 113.29 | 67.71 |      | 234.57 | 220.43 | 163.71  | 99.57   | 65.29  |      |
| N       | 42.00  | 441.00 | 759.00 | 1023.00 | 317.00 |      |      |      | 572.00 | 1027.00 | 533.00 | 9.00  |      | 465.00 | 821.00 | 1129.00 | 1396.00 | 763.00 |      |

\* p <0.05 test for difference in mean time to vaccination between girls and boys
